# Supplementary material for: Exogenous WNT5A and WNT11 proteins rescue CITED2 dysfunction in mouse embryonic stem cells and zebrafish morphants
Source: PubMed Central journal article supplement (PMC6680046; doi:10.1038/s41419-019-1816-6), 2019-08-05
Supplement: 41419_2019_1816_MOESM4_ESM.pdf [file 41419_2019_1816_MOESM4_ESM.pdf]

**Table S3 – Primers used for qPCR**

| qPCR      | Forward primer           | Reverse primer             | Reference                     |
|-----------|--------------------------|----------------------------|-------------------------------|
| Bmp4      | TTCCTGGTAACCGAATGCTGA    | CCTGAATCTCGGCGACTTTTT      | (Kim et al., 2010)            |
| Bmp5      | AGCCTGCAAGAAGCACGAAC     | AAAAGAACATTCCCCGTCACAA     | (Kim et al., 2010)            |
| Brachyury | CTCTAATGTCCCTCCCTTGTGGCC | TGCAGATTGTCTTTGGCTACTTTG   | (Ivanova et al., 2006)        |
| Cer1      | CTCTGGGGAAGGCAGACCTAT    | CCACAAACAGATCCGGCTT        | (Li et al., 2013)             |
| Cited2    | CGCATCATCACCAGCAGCAG     | CGCTCGTGGCATTTCATGTTG      | (Kranc et al., 2015)          |
| Dkk1      | CTGAAGATGAGGAGTGCGGCTC   | GGCTGTGGTCAGAGGGCATG       | (Kemp et al., 2005)           |
| Dppa5a    | GCCGTGCGTGGTGATAAGC      | GCCAAACAGATATTTTCAGCACCAGC | (Tanaka et al., 2002)         |
| Eomes     | CCGGACAACACTACGATTCCA    | ACCTCCAGGGACAATCTGATG      | (van den Ameele et al., 2012) |
| Fgf5      | CTGTATGGACCCACAGGGAGTAAC | ATTAAGCTCCTGGGTCGCAAG      | (Ivanova et al., 2006)        |
| Fgf8      | CCAGCCCCAAACTACCCGAGGAG  | CGCGCAGACCCAGCCCAGGAT      | (Zhang et al., 2003)          |
| Fgf10     | CAGCGGGACCAAGAATGAAG     | TGACGGCAACAACCTCCGATTT     | (Sultana et al., 2009)        |
| Gapdh     | TCCCACTCTTCCACCTTCGATGC  | GGGTCTGGGATGAAATTGTGAGG    | (Ivanova et al., 2006)        |
| Gsc       | AAACGCCGAGAAGTGGAACAAG   | AAGGCAGGGTGTGTGCAAGTAG     | (Ivanova et al., 2006)        |
| Isl1      | CTTAAGCATGCCCTGTAGCTGG   | CAGACAGGAGTCAAACACAATCCC   | (Ivanova et al., 2006)        |
| Mixl1     | CGCCAGAGTGGGAAAGTCA      | CAGGGCAATGGAGGAAAAC        | (Date et al., 2013)           |
| Mesp1     | TGTACGCAGAAACAGCATCC     | TTGTCCCCTCCACTCTTCAG       | (Zhong and Jin, 2009)         |
| Nkx2.5    | CCACTCTCTGCTACCCACCT     | CCAGGTTCCAGGATGTCTTTGA     | (Sachinidis et al., 2006)     |
| Nodal     | TGGCGTACATGTTGAGCCTCT    | TGAAAGTCCAGTTCTGTCCGG      | (Ogawa et al., 2007)          |
| Tbx5      | GGACCCAGTCCCTTGAATGG     | TCCAGGCTGAGGAGTTCTAGGC     | (Ivanova et al., 2006)        |
| Wnt3      | ACCTGGAGAAGGCTGGAAGT     | CTTGTCTTTGAGGAAGTCGC       | (Sultana et al., 2009)        |
| Wnt3a     | TGGCTCTCTCGGATACCTC      | AAAGCTACTCCAGCGGAGGC       | (Nemeth et al., 2007)         |
| Wnt5a     | CAAATAGGCAGCCGAGAGAC     | TCTAGCGTCCACGAACTCCT       | (Chen et al., 2007)           |
| Wnt5b     | AGATAGGTAGCCGAGAGACTGC   | GGTAGCCGTACTIONCCACGTTG    | (Choi et al., 2011)           |
| Wnt11     | GCTCCATCCGCACCTGTT       | CGCTCCACCACTCTGTCC         | (Sultana et al., 2009)        |

## REFERENCES – Related to Table S3

- Chen, Y., Haviernik, P., Bunting, K.D., and Yang, Y.-C. (2007). Cited2 is required for normal hematopoiesis in the murine fetal liver. *Blood* *110*, 2889-2898.
- Choi, M., Jung, K., Park, J., Das, N., Chung, M., Choi, I., Lee, B., Park, K., and Chai, Y. (2011). Ethanol-induced small heat shock protein genes in the differentiation of mouse embryonic neural stem cells. *Archives of Toxicology* *85*, 293-304.
- Date, Y., Hasegawa, S., Yamada, T., Inoue, Y., Mizutani, H., Nakata, S., and Akamatsu, H. (2013). Major amino acids in collagen hydrolysate regulate the differentiation of mouse embryoid bodies. *Journal of Bioscience and Bioengineering* *116*, 386-390.
- Ivanova, N., Dobrin, R., Lu, R., Kotenko, I., Levorse, J., DeCoste, C., Schafer, X., Lun, Y., and Lemischka, I.R. (2006). Dissecting self-renewal in stem cells with RNA interference. *Nature* *442*, 533-538.
- Kemp, C., Willems, E., Abdo, S., Lambiv, L., and Leyns, L. (2005). Expression of all Wnt genes and their secreted antagonists during mouse blastocyst and postimplantation development. *Developmental Dynamics* *233*, 1064-1075.

Santos et al. 2019 – Wnt5a/Wnt11 rescue the defects caused by Cited2-depletion in vitro and in vivo

- Kim, B., Kim, Y., Sakuma, R., Hui, C.-C., R  ther, U., and Jorgensen, J.S. (2010). Primordial germ cell proliferation is impaired in Fused Toes mutant embryos. *Developmental Biology* *349*, 417-426.
- Kranc, K.R., Oliveira, D.V., Armesilla-Diaz, A., Pacheco-Leyva, I., Matias, A.C., Escapa, A.L., Subramani, C., Wheadon, H., Trindade, M., Nichols, J., *et al.* (2015). Acute loss of Cited2 impairs Nanog expression and decreases self-renewal of mouse embryonic stem cells. *Stem Cells* *33*, 699-712.
- Li, L., Liu, C., Biechele, S., Zhu, Q., Song, L., Lanner, F., Jing, N., and Rossant, J. (2013). Location of transient ectodermal progenitor potential in mouse development. *Development* *140*, 4533-4543.
- Nemeth, M.J., Topol, L., Anderson, S.M., Yang, Y., and Bodine, D.M. (2007). Wnt5a inhibits canonical Wnt signaling in hematopoietic stem cells and enhances repopulation. *Proceedings of the National Academy of Sciences* *104*, 15436-15441.
- Ogawa, K., Saito, A., Matsui, H., Suzuki, H., Ohtsuka, S., Shimosato, D., Morishita, Y., Watabe, T., Niwa, H., and Miyazono, K. (2007). Activin-Nodal signaling is involved in propagation of mouse embryonic stem cells. *J Cell Sci* *120*, 55-65.
- Sachinidis, A., Schwengberg, S., Hippler-Altenburg, R., Mariappan, D., Kamisetti, N., Seelig, B., Berkessel, A., and Hescheler, J. (2006). Identification of small signalling molecules promoting cardiac-specific differentiation of mouse embryonic stem cells. *Cell Physiol Biochem* *18*, 303-314.
- Sultana, D., Tomita, S., Hamada, M., Iwanaga, Y., Kitahama, Y., Khang, N., Hirai, S., Ohigashi, I., Nitta, S., Amagai, T., *et al.* (2009). Gene expression profile of the third pharyngeal pouch reveals role of mesenchymal MafB in embryonic thymus development. *Blood* *113*, 2976-2987.
- Tanaka, T.S., Kunath, T., Kimber, W.L., Jaradat, S.A., Stagg, C.A., Usuda, M., Yokota, T., Niwa, H., Rossant, J., and Ko, M.S.H. (2002). Gene Expression Profiling of Embryo-Derived Stem Cells Reveals Candidate Genes Associated With Pluripotency and Lineage Specificity. *Genome Research* *12*, 1921-1928.
- van den Aamele, J., Tiberi, L., Bondue, A., Paulissen, C., Herpoel, A., Iacovino, M., Kyba, M., Blanpain, C., and Vanderhaeghen, P. (2012). Eomesodermin induces Mesp1 expression and cardiac differentiation from embryonic stem cells in the absence of Activin. *EMBO Rep* *13*, 355-362.
- Zhang, Y., Wang, S., Song, Y., Han, J., Chai, Y., and Chen, Y. (2003). Timing of odontogenic neural crest cell migration and tooth-forming capability in mice. *Developmental Dynamics* *226*, 713-718.
- Zhong, X., and Jin, Y. (2009). Critical roles of coactivator p300 in mouse embryonic stem cell differentiation and nanog expression. *J Biol Chem* *284*, 9168-9175.
